# Supplementary material for: Seasonal and Diurnal Characteristics of the Vertical Profile of Aerosol Optical Properties in Urban Beijing, 2017–2021
Source: MDPI journal article supplement (doi:10.3390/rs15020475), 2023-01-13
Supplement: s1 [file s1]

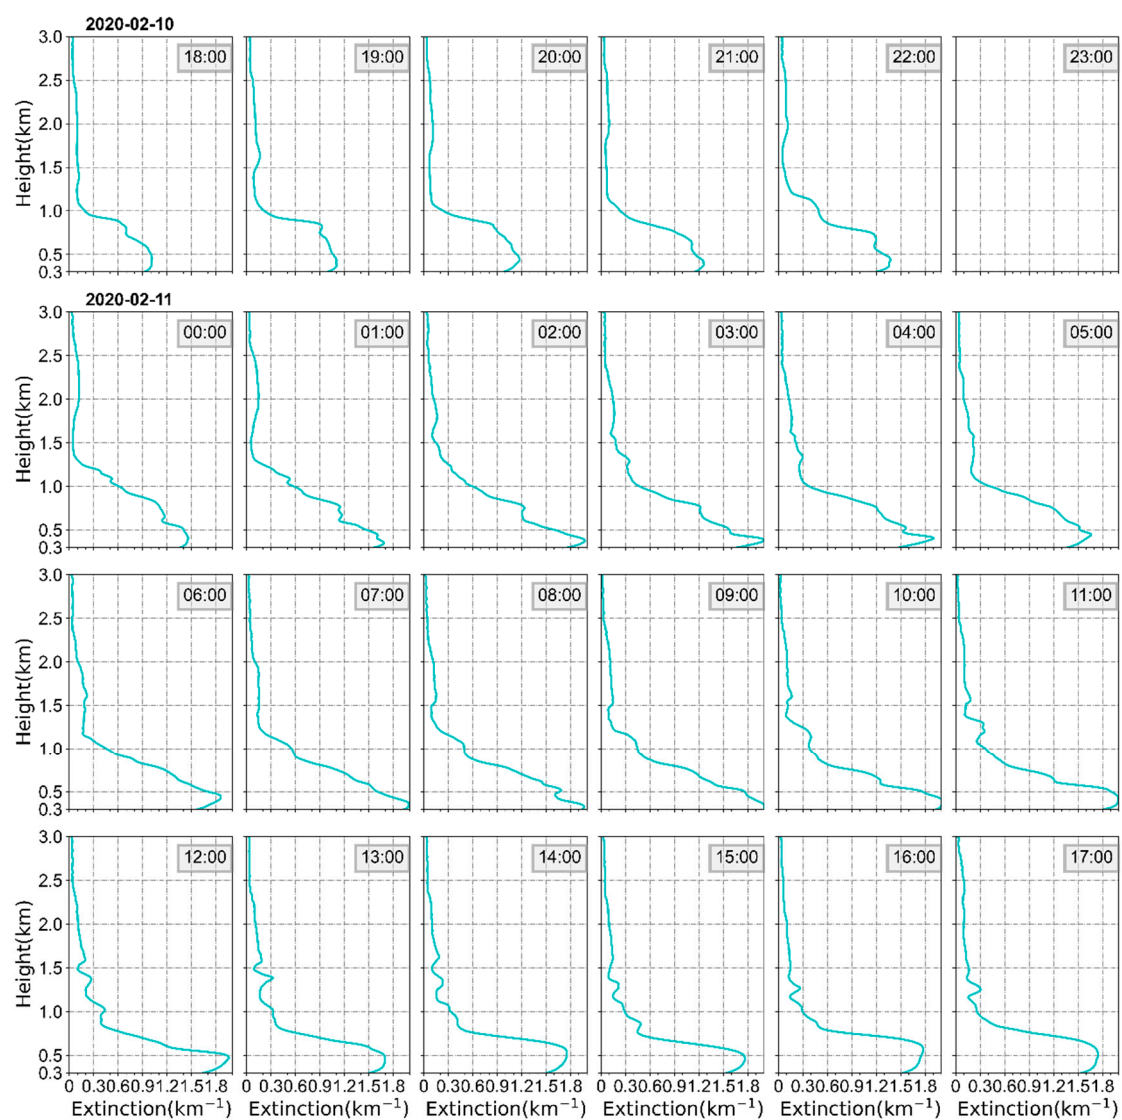

**Figure S1.** Vertical profile of the aerosol extinction coefficients in urban Beijing from 18:00 on 10 February to 17:00 on 11 February 2020.
